# Supplementary material for: Porous carbons embedded with nitrogen-coordinated cobalt as an exceptional electrochemical catalyst for high-performance Zn–air batteries
Source: Royal Society of Chemistry journal article supplement (doi:10.1039/d0nj02933e), 2020-01-01
Supplement: d0nj02933e1.pdf [file d0nj02933e1.pdf]

## Supplementary Information

### Porous Carbons Embedded with Nitrogen-Coordinated Cobalt as Exceptional Electrochemical Catalyst for High-Performance Zn-Air Batteries

Shice Wei,<sup>‡a</sup> Fan Zhang,<sup>‡a</sup> Zhenying Chen,<sup>a</sup> Junjie Ding,<sup>b</sup> Bai Xue,<sup>\*a</sup> Chenbao Lu,<sup>\*a</sup>

<sup>a</sup> School of Chemistry and Chemical Engineering, Shanghai Jiao Tong University, 800 Dongchuan Road, Shanghai 200240, China.

<sup>b</sup> Key Lab for Advanced Materials, Institute of Applied Chemistry, East China University of Science and Technology, 130 Meilong Road, Shanghai 200237, China.

<sup>‡</sup> These authors contributed equally to this work.

Address correspondence to E-mail: [bxue79@sjtu.edu.cn](mailto:bxue79@sjtu.edu.cn); [castle@sjtu.edu.cn](mailto:castle@sjtu.edu.cn)

## Materials characterization

The morphology and elemental mapping information of the samples were characterized by scanning electron microscopy (SEM, Sirion 200, 25 kV) and transmission electron microscopy (TEM, JEOL JEM-2010, 200 kV). FT-IR spectroscopy was performed on a Spectrum 100 (Perkin Elmer, Inc., USA) spectrometer with a scan range of 3000-500  $\text{cm}^{-1}$ . X-ray diffraction (XRD) measurements were carried out on a RigakuD/Max 2500 X-ray diffractometer with Cu  $K\alpha$  radiation ( $\lambda=1.54 \text{ \AA}$ ) at an operating voltage of 40 kV and a generator current of 50 mA with a scanning speed of  $6^\circ \text{ min}^{-1}$  over the range  $5-80 (2\theta)$ . Raman spectra were recorded on a SENTERRA with excitation from the 532 nm line of an Ar-ion laser with a power of about 5 mW. TGA was performed using a Q5000IR (TA Instruments, USA) thermogravimetric analyzer at a heating rate of  $20^\circ \text{C min}^{-1}$  under nitrogen flow. The physical sorption isotherms were measured via an Auto-sorb-iQA3200-4 sorption analyzer (Quantatech Co., USA) based on  $\text{N}_2$  adsorption/desorption at 77 K. X-ray photoemission spectroscopy (XPS) measurements were performed on a PHI-5000C ESCA system with Al  $K\alpha$  radiation as an X-ray source for radiation and the C 1s value was set at 284.6 eV for charge corrections.

## Electrochemical measurements

The working electrode was prepared by loading a catalyst sample film onto a glassy carbon electrode with a diameter of 5.61 mm. To prepare the ink sample, 5 mg sample was dispersed in 500  $\mu\text{L}$  of a mixture of Nafion (5 wt%, 50  $\mu\text{L}$ ) and ethanol (450  $\mu\text{L}$ ). After stirring for a day and the sonication for 30 minutes, the homogeneous ink (10  $\mu\text{L}$ ) was carefully put on the glass carbon disk electrode and the ink slowly dried in air forming the catalyst sample film. For comparison, the commercial catalyst Pt/C (20%) was prepared under the same method. The potential in this study was correlated to RHE by adding 0.944 V, based on the calibration measurement in  $\text{H}_2$ -saturated 0.1 M KOH.

The electrochemical measurements using CV, rotating disk electrode (ORR polarization curves, RDE) and RRDE investigations were performed by using a basic bipotentiostat (MSR Rotator from Pine Research Instrumentation, USA) with a three-electrode cell system in which a rotating glassy carbon disk and platinum ring electrode loading samples (Pine Research Instrumentation, USA) as the working electrode, while Pt wire and Ag/AgCl (KCl, 4 M) were counter electrode and reference

electrode, respectively. The electrochemical experiments were carried out in O<sub>2</sub>-saturated 0.1 M KOH electrolyte for the ORR. For CV measurements, the potential range was cyclically scanned between –1.0 and 0.1 V (vs Ag/AgCl) at a sweep rate of 100 mV s<sup>-1</sup> at room temperature after purging O<sub>2</sub> or N<sub>2</sub> gas for 30 minutes. For RDE measurements, the potential range was scanned between –1.0 and 0.1 V (vs Ag/AgCl) at a sweep rate of 10 mV s<sup>-1</sup> at room temperature after purging O<sub>2</sub> gas for 30 minutes. RDE measurements were performed at different rotating speeds, from 225 to 2500 rpm.

The transferred electron number (n) per oxygen molecule in the ORR process at the electrode can be calculated by the K-L equations (S1)-(S3):

$$\frac{1}{J} = \frac{1}{J_L} + \frac{1}{J_K} = \frac{1}{B\omega^{1/2}} + \frac{1}{J_K} \quad (S1)$$

$$B=0.62nFC_0(D_0)^{2/3\nu-1/6} \quad (S2)$$

$$J_K=nFkC_0 \quad (S3)$$

where J is the measured current density; J<sub>L</sub> and J<sub>K</sub> are the diffusion-limiting and kinetic current densities; ω is the angular velocity of the rotating electrode (ω = 2πN, N is the linear rotation speed); F is the Faraday constant (F=96485 C mol<sup>-1</sup>); C<sub>0</sub> is the concentration of O<sub>2</sub>; D<sub>0</sub> is the diffusion coefficient of O<sub>2</sub>; ν is the kinematic viscosity of the electrolyte, and k is the electron transfer rate constant. In the electrolyte of O<sub>2</sub>-saturated 0.1 M KOH, C<sub>0</sub>, D<sub>0</sub>, and ν are 1.2×10<sup>-3</sup> M, 1.9×10<sup>-5</sup> cm<sup>2</sup> s<sup>-1</sup>, and 0.01 cm<sup>2</sup> s<sup>-1</sup>, respectively. For RRDE measurements, the potential range of the disk electrode was scanned between –1.0 and 0.1 V (vs Ag/AgCl) at a sweep rate of 10 mV s<sup>-1</sup> at room temperature under a rotation rate of 1600 rpm. The ring electrode was held at a constant potential of 0.5 V. The HO<sub>2</sub><sup>-</sup> yield (%) and electron transfer number (n) can be calculated by equations (S4) and (S5):

$$\text{HO}_2^- (\%) = \frac{200 \times \frac{I_R}{N}}{4I_D + \frac{I_R}{N}} \quad (S4)$$

$$n = \frac{4I_D}{4I_D + \frac{I_R}{N}} \quad (S5)$$

where I<sub>D</sub> is the disk current and I<sub>R</sub> is the ring current. N is the ring collection efficiency, which was provided as 0.37 by manufacture.

The primary Zn-air batteries were tested in laboratory-constructed electrochemical cells. A two-electrode configuration was used by pairing catalytic materials loaded onto a carbon paper electrode (with the catalyst loading of  $1.0 \text{ mg cm}^{-2}$ ) with a Zn foil in the electrolyte of 6 M KOH. A polished Zn plate and a catalyst-coated carbon paper HCP-120) were used as the anode and cathode, respectively. The rechargeable Zn-air batteries were also constructed with the same process of the primary Zn-air batteries, except for using 6 M KOH with 0.1 M  $\text{ZnCl}_2$  as the electrolyte. Based on the battery design, the area of the gas diffusion layer exposed to the electrolyte was  $3.14 \text{ cm}^2$ . The preparation of the catalyst ink is the same as that in the measurements of ORR. The catalyst ink was dropped to the gas diffusion layer and then the gas diffusion electrode was dried at  $80 \text{ }^\circ\text{C}$  for 1 h. Single-cell testing of the catalyst was performed using a multichannel potentiostat and a laboratory-constructed Zn-air battery

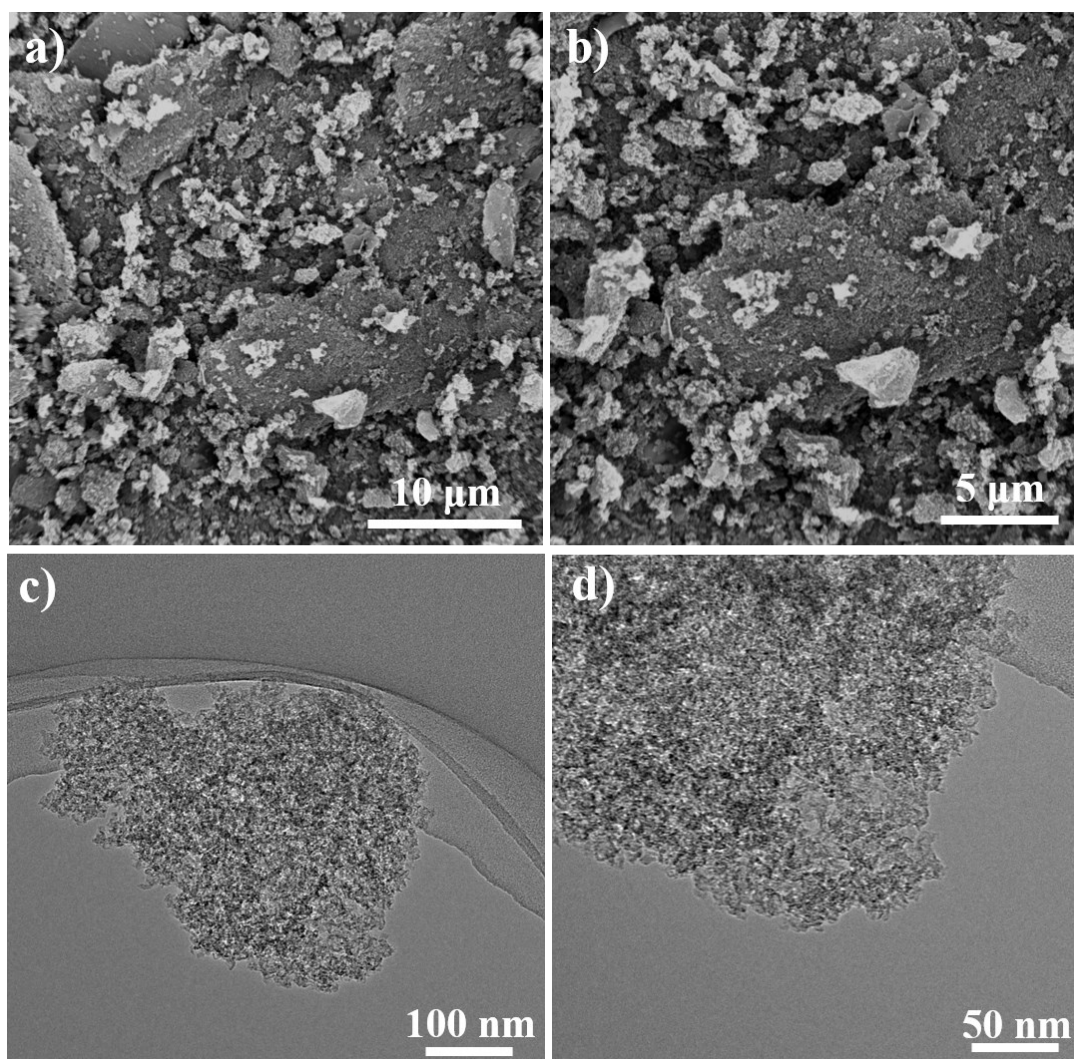

**Figure S1** a) and b) SEM images of Co-CTF; c) and d) TEM images of Co-CTF. Co-CTF displays block morphology consisting of plenty of nanoparticles.

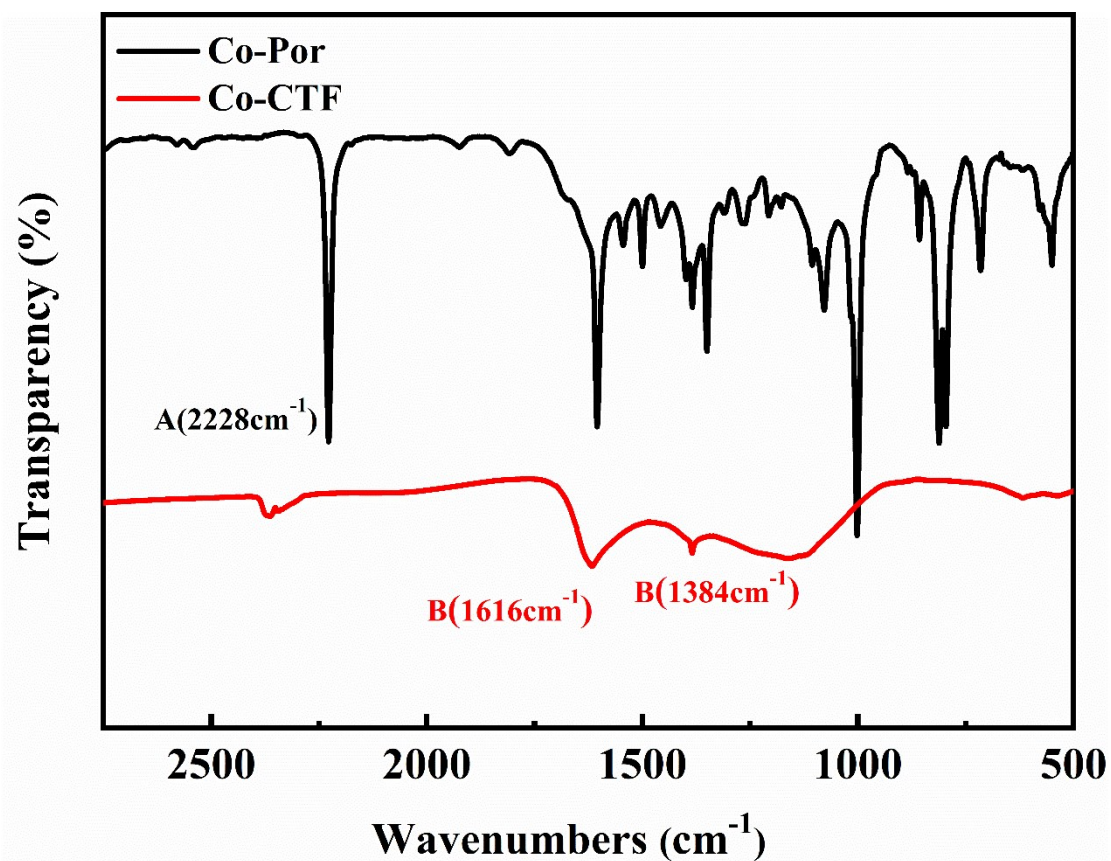

**Figure S2** FT-IR spectra of Co-Por and Co-CTF. The disappearance of the cyano band at  $2228\text{ cm}^{-1}$  and appearance peaks at  $1616$  and  $1384\text{ cm}^{-1}$  indicate the successful trimerization reaction.

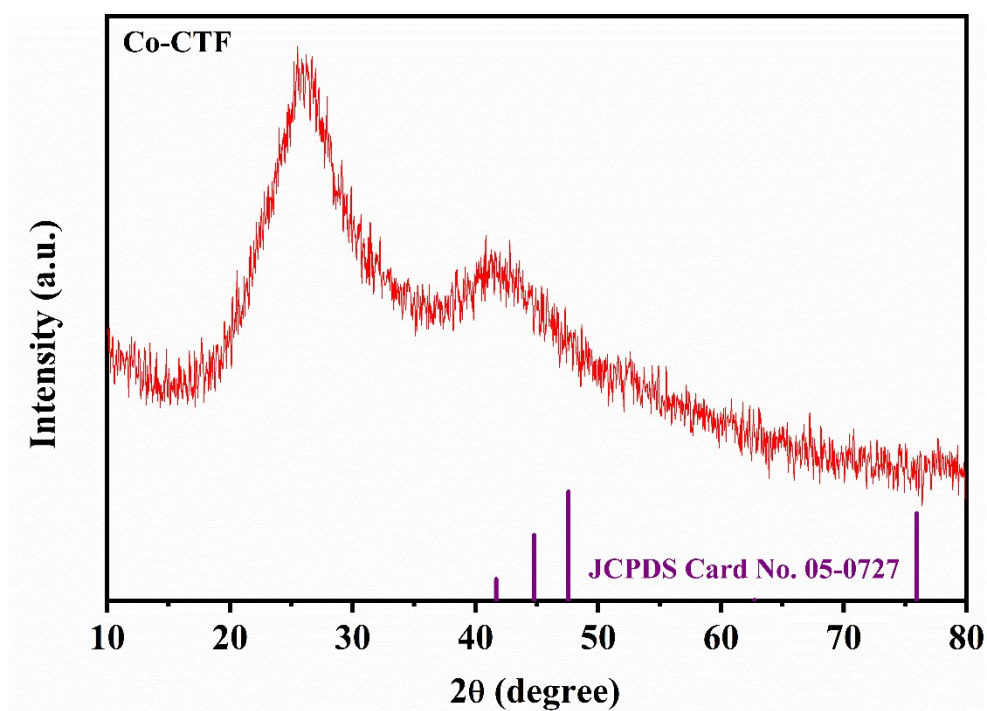

**Figure S3** XRD patterns of Co-CTF. Drop lines correspond to Co (JCPDS Card No. 05-0727). No feature X-ray diffraction (XRD) peaks of CTF presented in the XRD patterns (Figure S3), which can be attributed to the harsh polymerization condition.

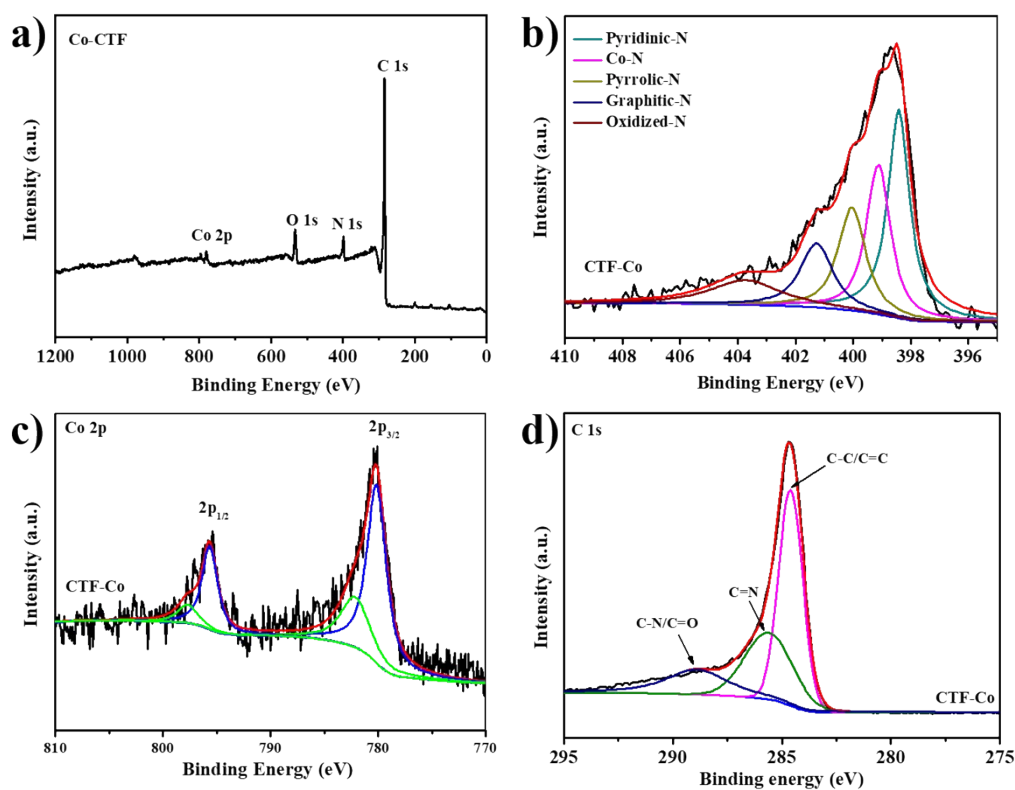

**Figure S4** a) XPS spectrum of Co-CTF, indicates the existence of C, N, O and Co elements. b) High-resolution XPS N 1s spectrum of Co-CTF. The nitrogen species can be divided into five individual peaks, corresponding to Pyridinic-N at 398.5 eV, Co-N at 399.3 eV, Pyrrolic-N at 400.8eV, Graphitic-N at 401.7 and Oxidized-N at 403.5, respectively. c) High-resolution XPS Co 2p spectrum of Co-CTF. The Co 2p spectrum can be deconvoluted into the peak at 780.0 and 795.2 eV corresponding to Co 2p<sub>3/2</sub> and Co 2p<sub>1/2</sub> and the green lines can be attributed to the satellite peak. d) High-resolution XPS C 1s spectrum of Co-CTF. The C 1s spectrum can be deconvoluted into the peak at 284.6, 285.6 and 288.9 corresponding to C-C/C=C, C=N, and C-N/C=O.

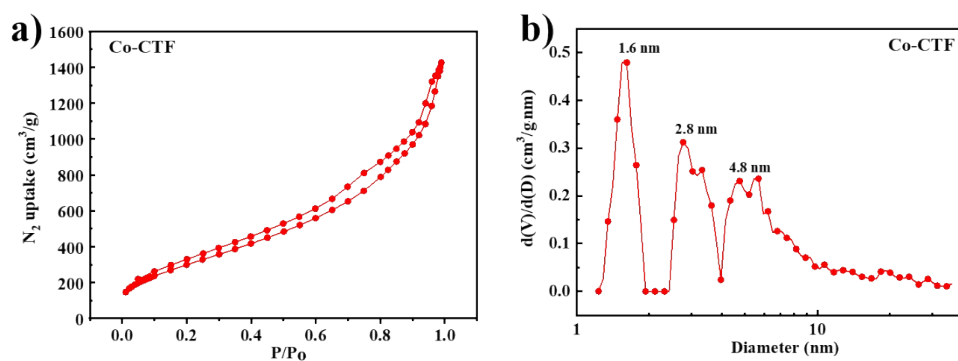

**Figure S5** a)  $N_2$ -adsorption/desorption isotherm of Co-CTF; b) Corresponding pore-size distribution curves calculated from the adsorption branch of the isotherms by the DFT method.



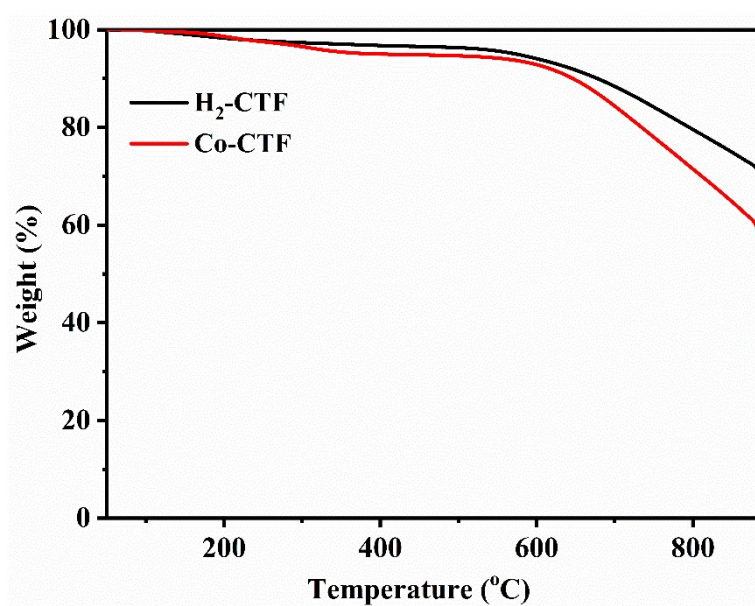

**Figure S6** TGA curves of as-prepared H<sub>2</sub>-CTF and Co-CTF from 50 to 900 °C under N<sub>2</sub> gas flow with a temperature ramp of 20 °C min<sup>-1</sup>. Both H<sub>2</sub>-CTF and Co-CTF exhibit excellent thermal stability.

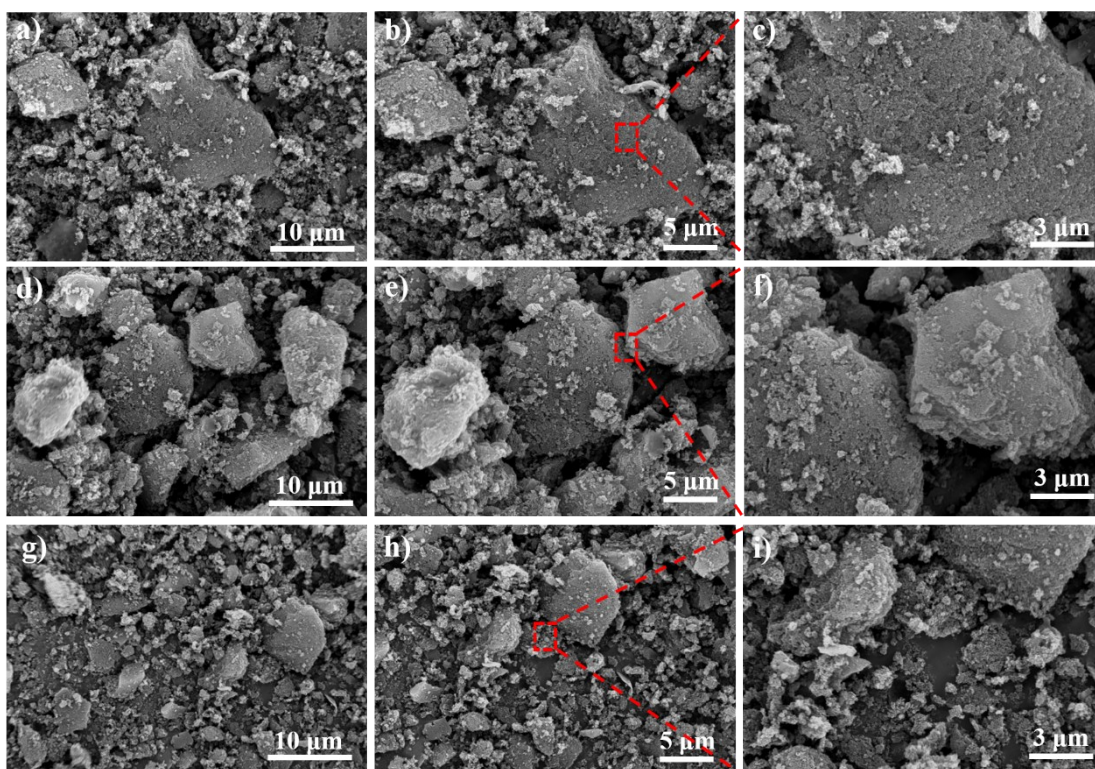

**Figure S7** a), b) and c) SEM images of Co/N-PC-800; d), e) and f) SEM images of Co/N-PC-900; g), h) and i) SEM images of Co/N-PC-1000.

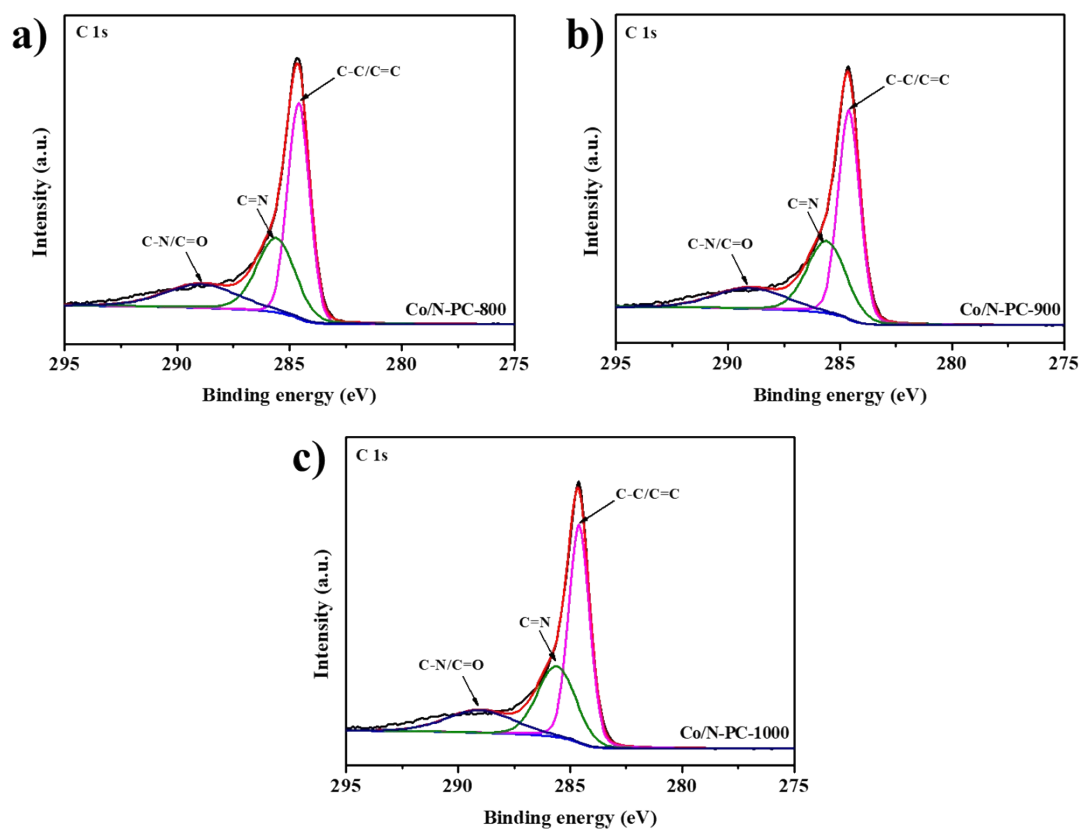

**Figure S8** High-resolution C 1s spectra of a) Co/N-PC-800; b) Co/N-PC-900; c) Co/N-PC-1000. The high-resolution XPS C 1s spectra can be deconvoluted into the peaks at 284.6, 285.6 and 288.9 eV corresponding to C-C/C=C, C=N, and C-N/C=O, respectively.

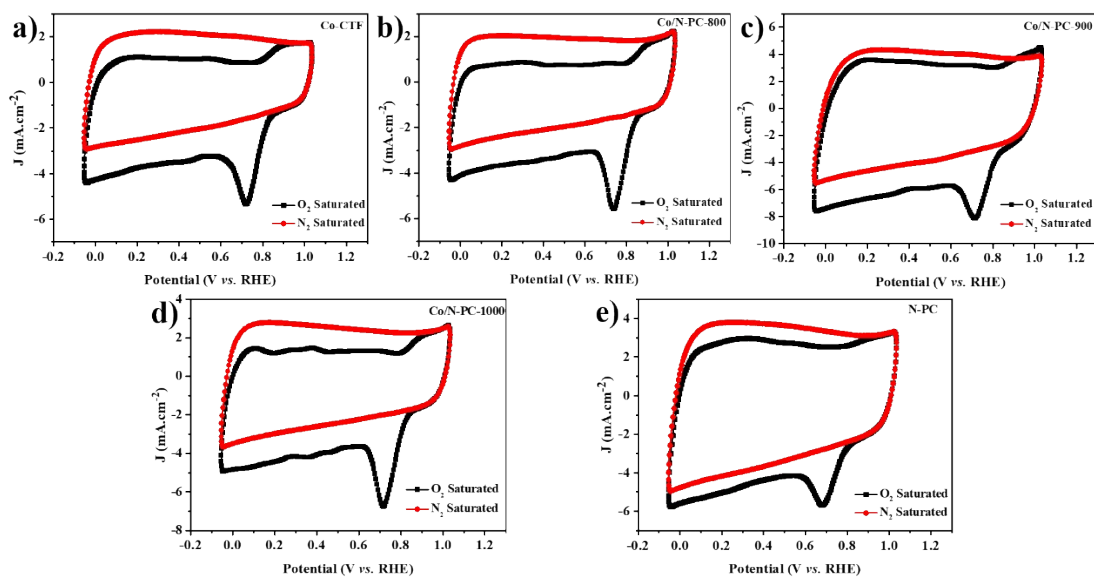

**Figure S9** Cyclic voltammetry (CV) curves performed in N<sub>2</sub>-saturated (red curves) and O<sub>2</sub>-saturated (black curves) 0.1 M KOH of a) Co-CTF; b) Co/N-PC-800; c) Co/N-PC-900; d) Co/N-PC-1000; e) N-PC. A pronounced oxygen reduction current peak at about 0.70 V is observed for all of the prepared materials in O<sub>2</sub>-saturated KOH electrolyte, indicating that the materials have the electrocatalytic ability for oxygen reduction reaction.

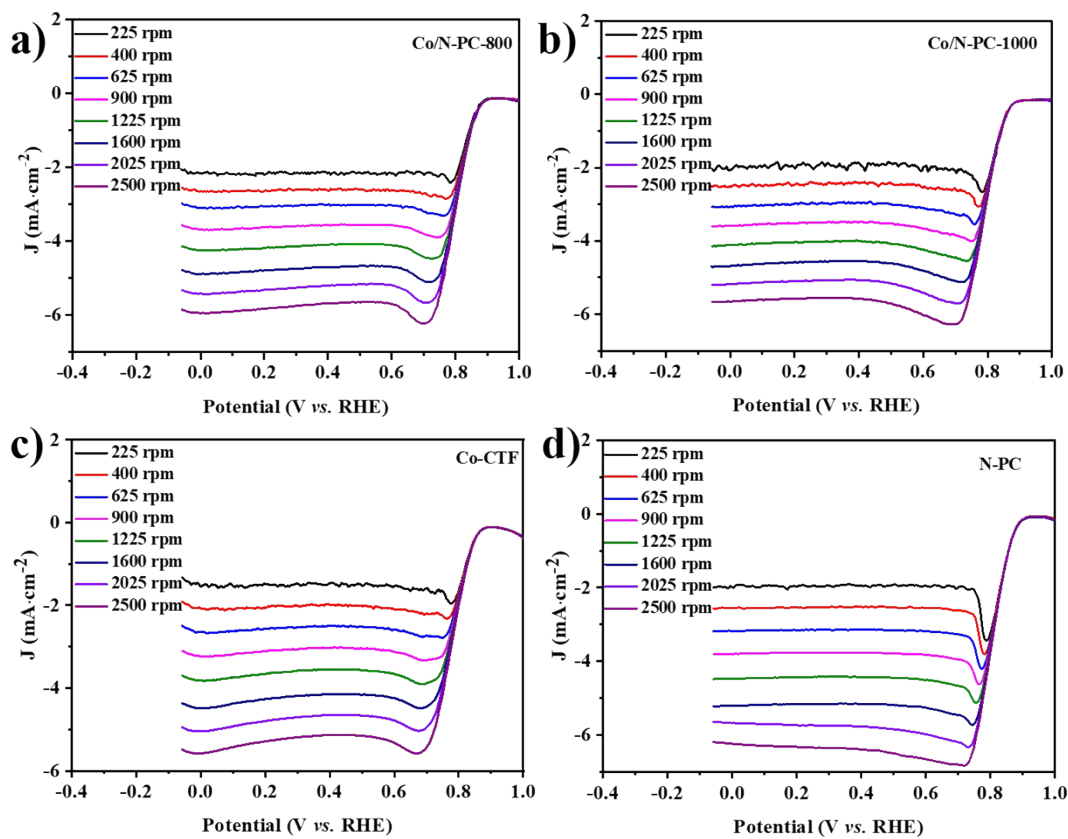

**Figure S10** ORR polarization curves of a) Co/N-PC-800; b) Co/N-PC-1000; c) Co-CTF; d) N-PC at different rotation rates from 225 to 2500 rpm.

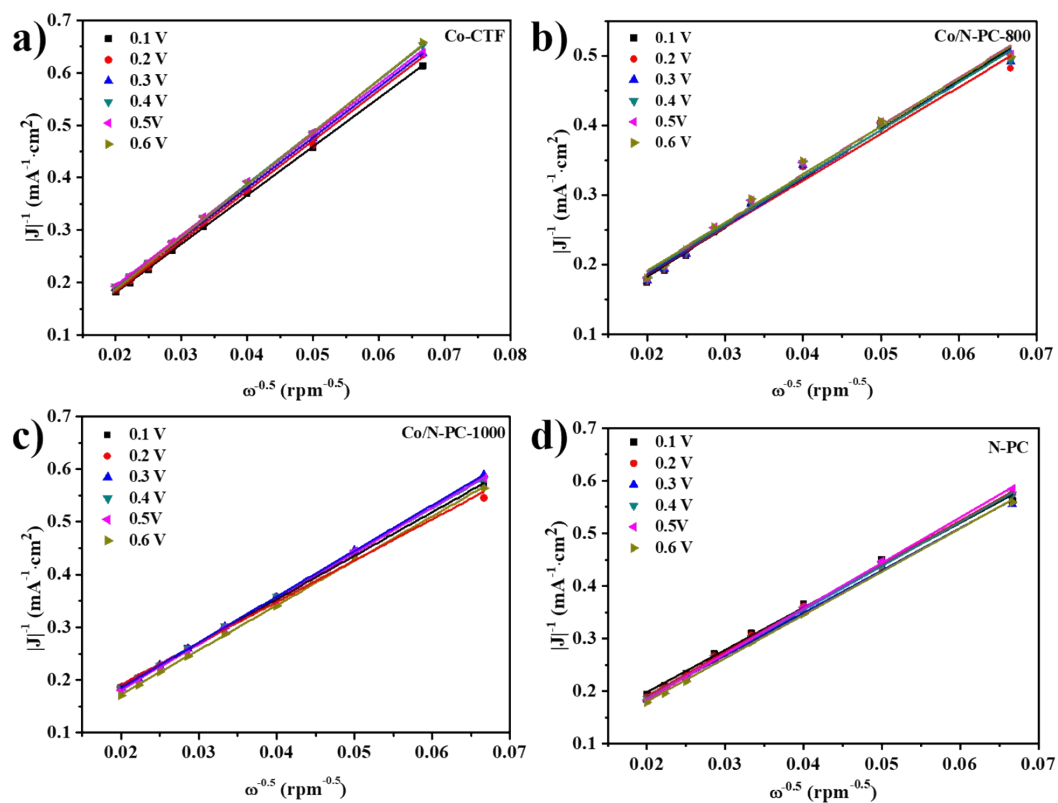

**Figure S11** Koutecky–Levich plots of a) Co-CTF; b) Co/N-PC-800; c) Co/N-PC-1000; d) N-PC obtained from ORR polarization curves at different electrode potentials. All of these K-L plots at different potentials exhibit a good linear relationship, indicating the first-order reaction kinetics to the dissolved O<sub>2</sub>.

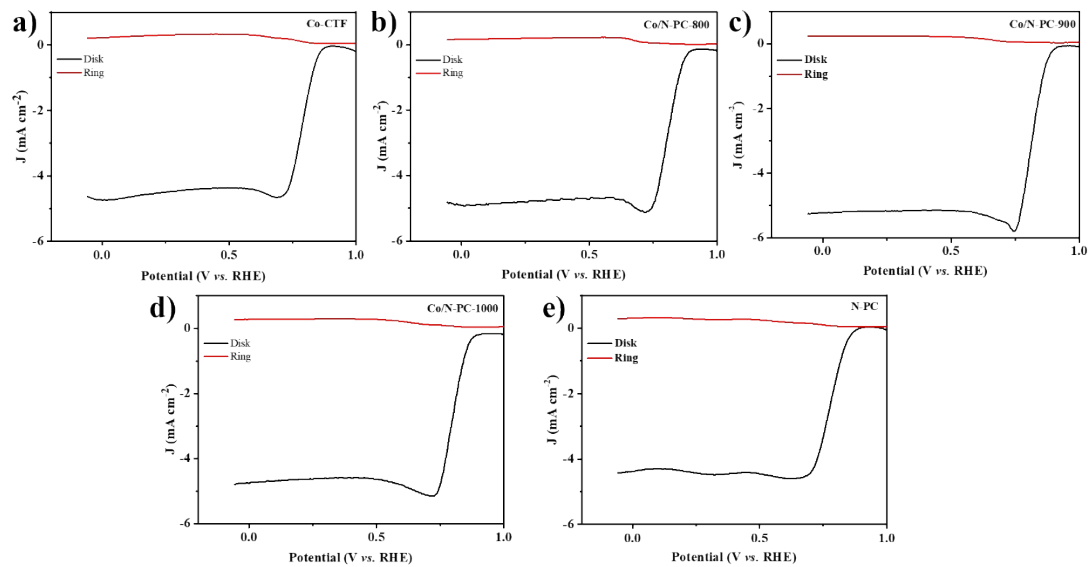

**Figure S12** RRDE curves of a) Co-CTF; b) Co/N-PC-800; c) Co/N-PC-900; d) Co/N-PC-1000; e) N-PC in O<sub>2</sub>-saturated 0.1 M KOH solution. All samples were measured at a rotation rate of 1600 rpm.

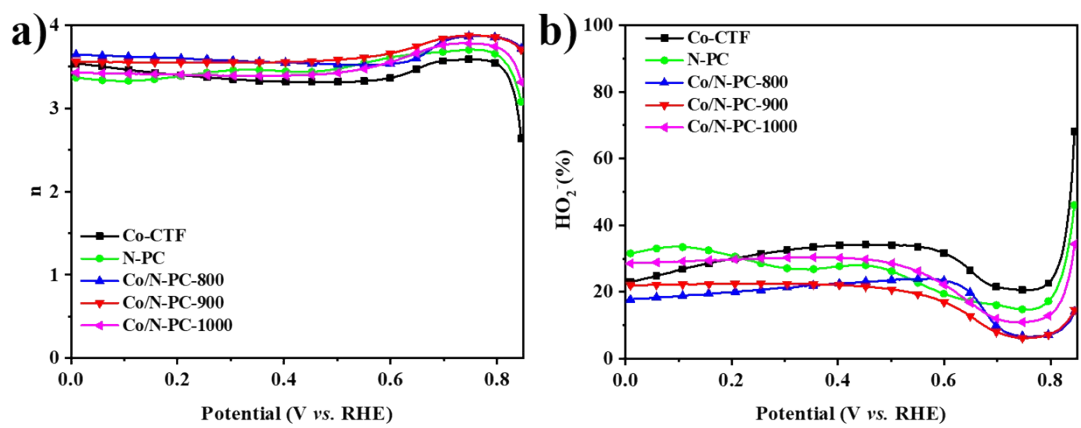

**Figure S13** a) Electron transfer number ( $n$ ) of Co-CTF, N-PC, Co/N-PC-800, Co/N-PC-900 and Co/N-PC-1000; b)  $\text{HO}_2^-$  yield of Co-CTF, N-PC, Co/N-PC-800, Co/N-PC-900 and Co/N-PC-1000.



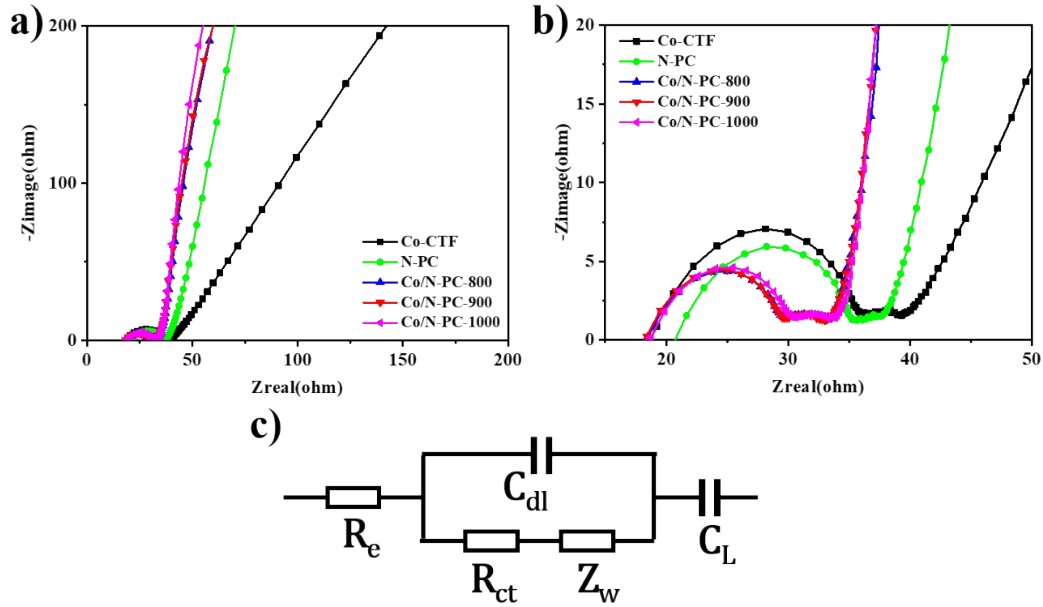

**Figure S14** a) and b) Nyquist plots of Co-CTF, N-PC, Co/N-PC-800, Co/N-PC-900 and Co/N-PC-1000; c) The electrical equivalent circuit used for fitting impedance spectra.  $R_e$  is the electrolyte resistance,  $C_{dl}$  and  $R_{ct}$  are the double-layer capacitance and charge-transfer resistance, respectively,  $Z_w$  is the Warburg impedance, and  $C_L$  is the limit capacitance. The calculated  $R_{ct}$  is 15.9 for Co-CTF, 14.8 for N-PC, 10.8 for Co/N-PC-800, 10.9 for Co/N-PC-900 and 11.2 for Co/N-PC-1000, respectively.

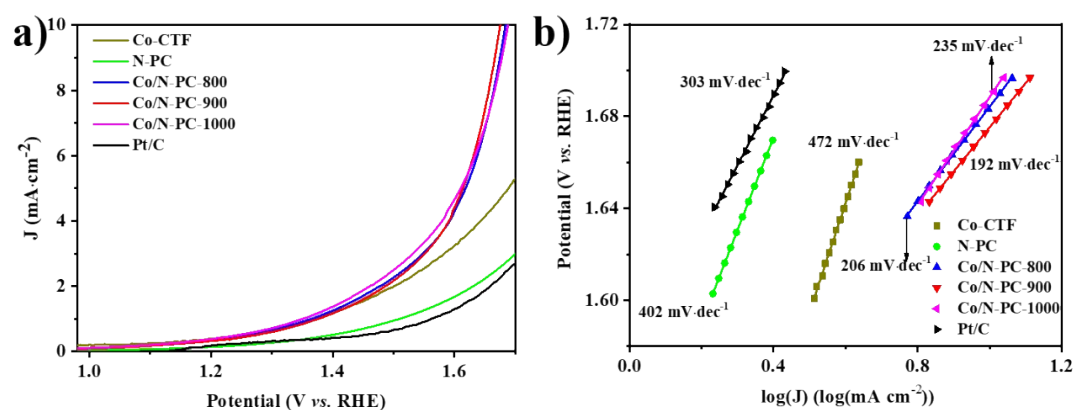

**Figure S15** a) OER polarization curves of Co-CTF, N-PC, Co/N-PC-800, Co/N-PC-900, Co/N-PC-1000 and commercial Pt/C in O<sub>2</sub>-saturated 0.1 M KOH a sweep rate of 10 mV·s<sup>-1</sup> at a rotation rate of 1600 rpm; b) Tafel plots of Co-CTF, N-PC, Co/N-PC-800, Co/N-PC-900, Co/N-PC-1000 and commercial Pt/C.

**Table S1.** N<sub>2</sub> sorption data for obtained materials.

| Sample       | S <sub>BET</sub> / (m <sup>2</sup> g <sup>-1</sup> ) <sup>a</sup> | S <sub>Langmuir</sub> / (m <sup>2</sup> g <sup>-1</sup> ) <sup>b</sup> | V <sub>Tot</sub> / (cm <sup>3</sup> g <sup>-1</sup> ) <sup>c</sup> | D <sub>av</sub> / (nm) <sup>d</sup> |
|--------------|-------------------------------------------------------------------|------------------------------------------------------------------------|--------------------------------------------------------------------|-------------------------------------|
| Co-CTF       | 1151                                                              | 1787                                                                   | 2.21                                                               | 7.67                                |
| Co/N-PC-800  | 911                                                               | 1530                                                                   | 1.94                                                               | 8.65                                |
| Co/N-PC-900  | 987                                                               | 1484                                                                   | 1.68                                                               | 6.80                                |
| Co/N-PC-1000 | 874                                                               | 1436                                                                   | 1.49                                                               | 6.81                                |

<sup>a</sup> Surface area (m<sup>2</sup> g<sup>-1</sup>) calculated from the nitrogen adsorption based on the BET model.

<sup>b</sup> Surface area (m<sup>2</sup> g<sup>-1</sup>) calculated from the nitrogen adsorption isotherms based on the Langmuir model.

<sup>c</sup> The total pore volume (cm<sup>3</sup> g<sup>-1</sup>) calculated at P/P<sub>0</sub> = 0.99.

<sup>d</sup> Average pore diameter.

**Table S2.** The elemental contents of N, Co, O, C and the percentage of different nitrogen species in Co-CTF, N-PC, Co/N-PC-800, Co/N-PC-900 and Co/N-PC-1000 based on XPS results.

| Sample       | N wt.% |             |      |            |             |            | Co   | O    | C     |
|--------------|--------|-------------|------|------------|-------------|------------|------|------|-------|
|              | Total  | Pyridinic-N | Co-N | Pyrrolic-N | Graphitic-N | Oxidized-N | wt.% | wt.% | wt.%  |
| Co-CTF       | 6.57   | 32          | 24   | 19         | 14          | 11         | 2.63 | 7.25 | 83.54 |
| N-PC         | 2.18   | 29          | 0    | 32         | 20          | 19         | 0    | 7.14 | 90.69 |
| Co/N-PC-800  | 2.9    | 19          | 20   | 24         | 16          | 21         | 1.77 | 7.74 | 87.59 |
| Co/N-PC-900  | 2.12   | 13          | 17   | 27         | 26          | 17         | 1.24 | 6.23 | 90.40 |
| Co/N-PC-1000 | 1.63   | 12          | 14   | 29         | 25          | 20         | 0.77 | 4.50 | 93.10 |

**Table S3** The ORR performance of prepared materials and Pt/C from linear sweep voltammograms (LSVs) polarization curves.

| Catalysts    | Onset potential | Half-wave potential | $J_L^a$                | $J_k^b$                |
|--------------|-----------------|---------------------|------------------------|------------------------|
|              | (V vs RHE)      | (V vs RHE)          | (mA cm <sup>-2</sup> ) | (mA cm <sup>-2</sup> ) |
| Co-CTF       | 0.87            | 0.79                | 4.74                   | 3.23                   |
| N-PC         | 0.87            | 0.78                | 4.37                   | 2.35                   |
| Co/N-PC-800  | 0.89            | 0.81                | 4.92                   | 7.56                   |
| Co/N-PC-900  | 0.91            | 0.83                | 5.23                   | 13.25                  |
| Co/N-PC-1000 | 0.90            | 0.81                | 4.74                   | 3.90                   |
| Pt/C         | 0.95            | 0.81                | 5.65                   | 7.99                   |

<sup>a</sup> Limiting current density.

<sup>b</sup> Kinetic current density at 0.8 V.c

**Table S4** Comparison of the onset and half-wave potentials for ORR of non-noble metal catalysts systems from literature reprints and this work in alkaline medium.

| Catalysts                               | Electrolyte | Onset potential<br>(V vs RHE ) | Half-wave potential<br>(V vs RHE ) | $J_L^a$<br>(mA cm <sup>-2</sup> ) | Ref.      |
|-----------------------------------------|-------------|--------------------------------|------------------------------------|-----------------------------------|-----------|
| CoP-CMP800                              | 0.1 M KOH   | 0.88                           | 0.82                               | 4.62                              | 1         |
| GNC-Co                                  | 0.1 M KOH   | 0.88                           | 0.75                               | 4.50                              | 2         |
| Co@NCNT-700                             | 0.1 M KOH   | 0.89                           | 0.80                               | 4.75                              | 3         |
| Fe-N/C-800                              | 0.1 M KOH   | 0.93                           | 0.81                               | 4.77                              | 4         |
| Co/N-C-800                              | 0.1 M KOH   | 0.83                           | 0.77                               | 5.26                              | 5         |
| Co@Co <sub>3</sub> O <sub>4</sub> /NC-2 | 0.1 M KOH   | 0.89                           | 0.74                               | 4.50                              | 6         |
| CoN/C                                   | 0.1 M KOH   | 0.85                           | 0.81                               | 4.58                              | 7         |
| Cu-CTF/CP                               | 0.1 M NaOH  | 0.91                           | 0.79                               | 5.25                              | 8         |
| FeNC-800                                | 0.1 M KOH   | 0.89                           | 0.815                              | 5.21                              | 9         |
| Fe <sub>3</sub> C/C-700                 | 0.1 M KOH   | 0.94                           | 0.83                               | 4.20                              | 10        |
| NiO/CoN PINWs                           | 0.1 M KOH   | 0.89                           | 0.68                               | 4.42                              | 11        |
| D-Co@CNG                                | 0.1 M KOH   | 0.88                           | 0.81                               | 4.66                              | 12        |
| Co-N <sub>x</sub> -C graphene           | 0.1 M KOH   | 0.84                           | 0.80                               | 4.75                              | 13        |
| NP-Fe-NHPC                              | 0.1 M KOH   | 0.97                           | 0.88                               | 5.50                              | 14        |
| MnO/Co/PGC                              | 0.1 M KOH   | 0.95                           | 0.78                               | 6.00                              | 15        |
| NC@Co-NGC<br>DSNCs                      | 0.1 M KOH   | 0.92                           | 0.82                               | 5.25                              | 16        |
| Co/N-PC-900                             | 0.1 M KOH   | 0.91                           | 0.83                               | 5.23                              | This work |

<sup>a</sup> Limiting current density.

## Reference:

- [1] Z.-S. Wu, L. Chen, J. Liu, K. Parvez, H. Liang, J. Shu, H. Sachdev, R. Graf, X. Feng, K. Müllen, *Adv. Mater.*, 2014, **26**, 1450-1455.
- [2] S. Li, D. Wu, C. Cheng, J. Wang, F. Zhang, Y. Su, X. Feng, *Angew. Chem., Int. Ed.*, 2013, **125**, 12327-12331.
- [3] Y. Hao, Z. Lu, G. Zhang, Z. Chang, L. Luo, X. Sun, *Energy Technol.*, 2016, **5**, 1265-1271.
- [4] W. Niu, L. Li, X. Liu, N. Wang, J. Liu, W. Zhou, Z. Tang, S. Chen, *J. Am. Chem. Soc.*, 2015, **137**, 5555-5562.
- [5] Y. Su, Y. Zhu, H. Jiang, J. Shen, X. Yang, W. Zou, J. Chen, C. Li, *Nanoscale*, 2014, **6**, 15080-15089.
- [6] A. Aijaz, J. Masa, C. Rösler, W. Xia, P. Weide, A. J. R. Botz, R. A. Fischer, W. Schuhmann, M. Muhler, *Angew. Chem., Int. Ed.*, 2016, **55**, 4087-4091.
- [7] L. An, W. Huang, N. Zhang, X. Chen, D. Xia, *J. Mater. Chem. A*, 2014, **2**, 62-65.
- [8] K. Iwase, T. Yoshioka, S. Nakanishi, K. Hashimoto, K. Kamiya, *Angew. Chem., Int. Ed.*, 2015, **54**, 11068-11072.
- [9] K. Yuan, S. Sfaelou, M. Qiu, D. Lützenkirchen-Hecht, X. Zhuang, Y. Chen, C. Yuan, X. Feng, U. Scherf, *ACS Energy Lett.*, 2018, **3**, 252-260.
- [10] Y. Hu, J. O. Jensen, W. Zhang, L. N. Cleemann, W. Xing, N. J. Bjerrum, Q. Li, *Angew. Chem., Int. Ed.*, 2014, **53**, 3675-3679.
- [11] J. Yin, Y. Li, F. Lv, Q. Fan, Y.-Q. Zhao, Q. Zhang, W. Wang, F. Cheng, P. Xi, S. Guo, *ACS Nano*, 2017, **11**, 2275-2283.
- [12] Y. Huang, Q. Liu, J. Lv, D. D. Babu, W. Wang, M. Wu, D. Yuan, Y. Wang, *J. Mater. Chem. A*, 2017, **5**, 20882-20891.
- [13] C. Tang, B. Wang, H.-F. Wang, Q. Zhang, *Adv. Mater.*, 2017, **29**, 1703185.
- [14] G. Chen, P. Liu, Z. Liao, F. Sun, Y. He, H. Zhong, T. Zhang, E. Zschech, M. Chen, G. Wu, J. Zhang, X. Feng, *Adv. Mater.*, 2020, **32**, 1907399.
- [15] X. F. Lu, Y. Chen, S. Wang, S. Gao, X. W. Lou, *Adv. Mater.*, 2019, **31**, 1902339.
- [16] S. Liu, Z. Wang, S. Zhou, F. Yu, M. Yu, C.-Y. Chiang, W. Zhou, J. Zhao, J. Qiu, *Adv. Mater.*, 2017, **29**, 1700874.
